# Supplementary material
Source: PubMed Central journal article supplement (PMC3149361)
Supplement: supp_M110.213553_jbc.M110.213553-1.pdf [file supp_M110.213553_jbc.M110.213553-1.pdf]

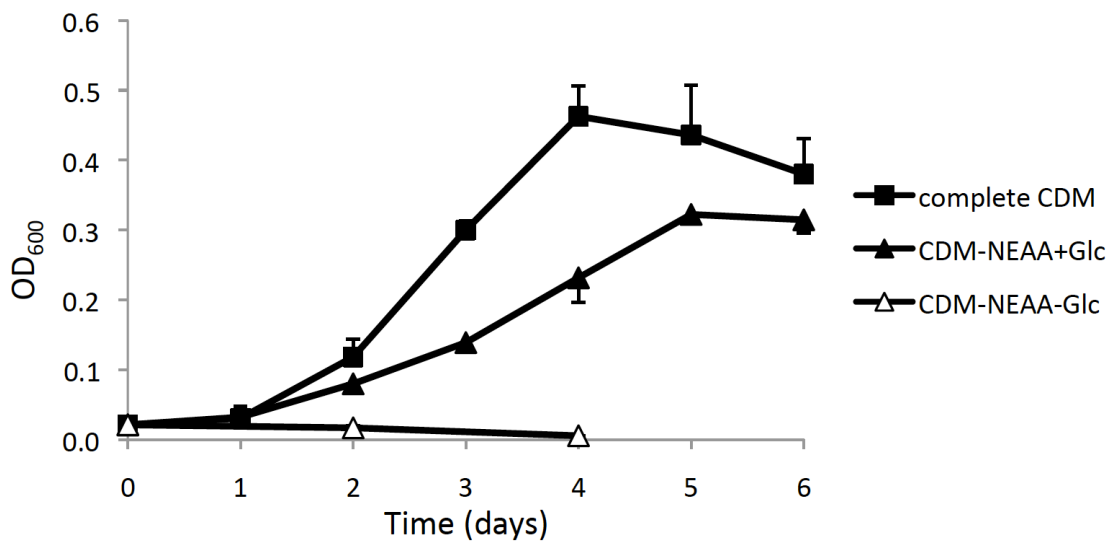

**Figure S1. Non-essential amino acids are required for optimal growth of *L. mexicana* promastigotes.** *L. mexicana* promastigotes were cultivated in CDM with or without the non-essential amino acids (NEAA) or glucose (Glc). Growth was monitored by measurement of absorbance at OD<sub>600</sub>. Growth curves were done in triplicate (error bars are SEM).
