# Supplementary material
Source: PubMed Central journal article supplement (PMC3149361)
Supplement: supp_M110.213553_jbc.M110.213553-2.pdf [file supp_M110.213553_jbc.M110.213553-2.pdf]

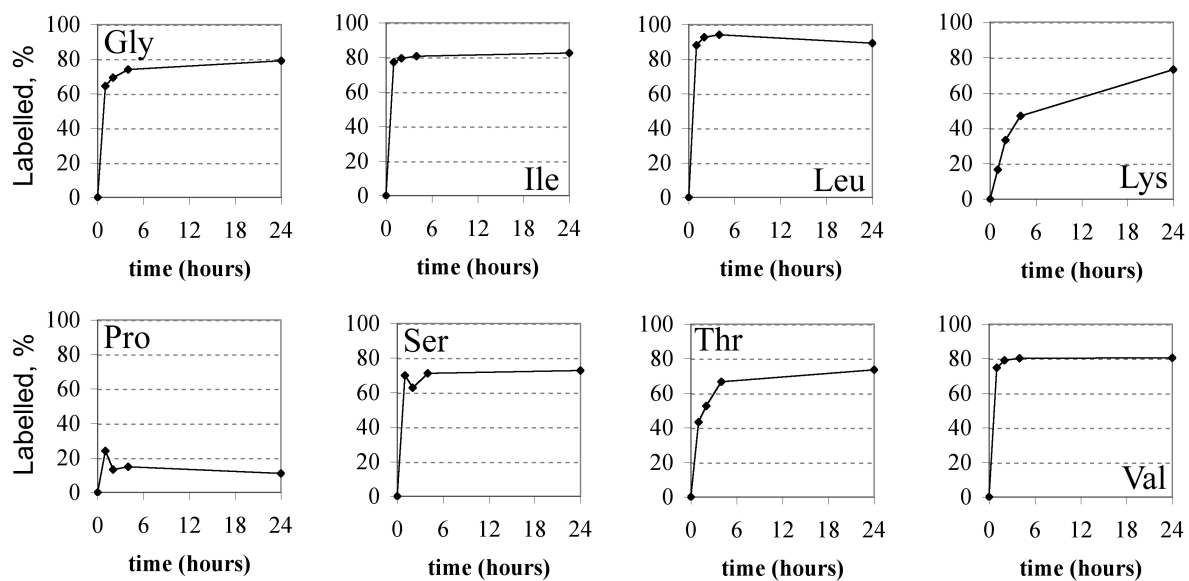

**Figure S2. Uptake of  $^{13}\text{C}$ -U-amino acids by *L. mexicana* promastigotes.**

*L. mexicana* promastigotes were cultivated in CDM containing a mixture of  $^{13}\text{C}$ -U-amino acids (Cambridge Isotope Laboratories). At the indicated time, promastigote metabolism was quenched and intracellular metabolites analyzed by GC-MS. The levels of  $^{13}\text{C}$ -enrichment in selected amino acids that were fully labeled in the medium are shown.
