# Supplementary material
Source: PubMed Central journal article supplement (PMC3149361)
Supplement: supp_M110.213553_jbc.M110.213553-3.pdf [file supp_M110.213553_jbc.M110.213553-3.pdf]

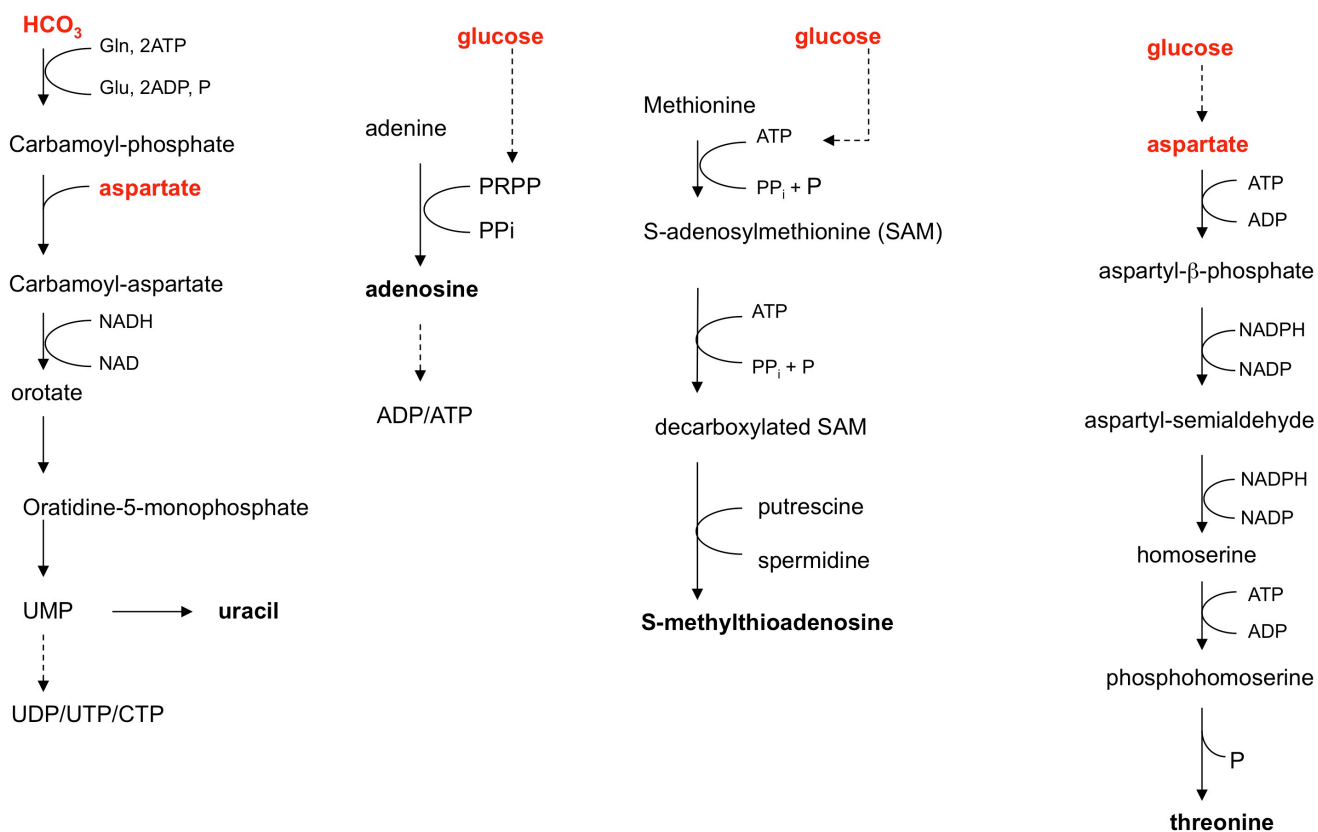

**Figure S3. Pathways of incorporation of  $^{13}\text{C}$ -U-glucose,  $^{13}\text{C}$ -aspartate and  $\text{H}^{13}\text{CO}_3$  into specific metabolites (bold text) detected by GC-MS.**
