# Supplementary material
Source: PubMed Central journal article supplement (PMC3149361)
Supplement: supp_M110.213553_jbc.M110.213553-4.pdf [file supp_M110.213553_jbc.M110.213553-4.pdf]

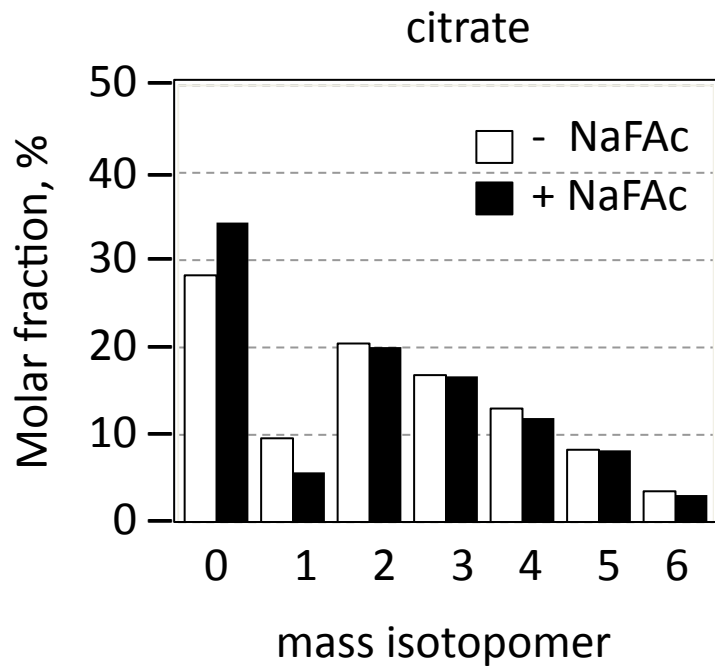

**Figure S4. Mass isotopomer analysis of citrate in NaFAC-treated *L. mexicana* promastigotes.** *L. mexicana* promastigotes were cultivated in M199 medium containing  $^{13}\text{C}$ -U-glucose in the presence or absence of NaFAC (0.5 mM). The relative abundance of different mass isotopomers of citrate (containing zero, one, two, etc  $^{13}\text{C}$ -atoms) was determined by GC-MS after labeling for 12 hr. Isotopomers containing +3 and +5  $^{13}\text{C}$  atoms were present at similar levels in the presence and absence of NaFAC indicating that C4 dicarboxylic acids generated in the glycosomes are imported into the mitochondrion to synthesize citrate even when flux around the complete cycle is reduced.
